# Supplementary material for: A Systematic Review on Bleeding Risk Scores’ Accuracy after Percutaneous Coronary Interventions in Acute and Elective Settings
Source: PubMed Central journal article supplement (PMC7912805; doi:10.3390/healthcare9020148), 2021-02-02
Supplement: healthcare-09-00148-s001.pdf [file healthcare-09-00148-s001.pdf]

**Table S1.** Definitions of bleeding risk scores.

| <b>Definitions of bleeding risk scores</b>                                                                                                                                                                                                                                                                                                                                                                                                                                                                                                                                                                                                                                                                                                                                                                                                                                                                                                                                                                                                               |                                                                                                                                                                                                                                                                                                                                                                                                                                                                       |                                                                                                   |
|----------------------------------------------------------------------------------------------------------------------------------------------------------------------------------------------------------------------------------------------------------------------------------------------------------------------------------------------------------------------------------------------------------------------------------------------------------------------------------------------------------------------------------------------------------------------------------------------------------------------------------------------------------------------------------------------------------------------------------------------------------------------------------------------------------------------------------------------------------------------------------------------------------------------------------------------------------------------------------------------------------------------------------------------------------|-----------------------------------------------------------------------------------------------------------------------------------------------------------------------------------------------------------------------------------------------------------------------------------------------------------------------------------------------------------------------------------------------------------------------------------------------------------------------|---------------------------------------------------------------------------------------------------|
| <b>PRECISE-DAPT score</b>                                                                                                                                                                                                                                                                                                                                                                                                                                                                                                                                                                                                                                                                                                                                                                                                                                                                                                                                                                                                                                |                                                                                                                                                                                                                                                                                                                                                                                                                                                                       |                                                                                                   |
| <ul style="list-style-type: none"> <li>Hemoglobin</li> <li>White blood cell count</li> <li>Age</li> <li>Creatinine clearance</li> <li>Prior bleeding</li> </ul>                                                                                                                                                                                                                                                                                                                                                                                                                                                                                                                                                                                                                                                                                                                                                                                                                                                                                          |                                                                                                                                                                                                                                                                                                                                                                                                                                                                       | Score $\geq 25$ – Short DAT<br>Score $< 25$ – Standard or long DAT                                |
| <b>DAPT score (after 12 months of uneventful DAT)</b>                                                                                                                                                                                                                                                                                                                                                                                                                                                                                                                                                                                                                                                                                                                                                                                                                                                                                                                                                                                                    |                                                                                                                                                                                                                                                                                                                                                                                                                                                                       |                                                                                                   |
| <ul style="list-style-type: none"> <li>Age <math>\geq 75</math> (-2p)</li> <li>65 to <math>&lt; 75</math> (-1p)</li> <li><math>&lt; 65</math> (0p)</li> <li>Cigarette smoking (+1p)</li> <li>Diabetes mellitus (+1p)</li> <li>MI at presentation (+1p)</li> </ul>                                                                                                                                                                                                                                                                                                                                                                                                                                                                                                                                                                                                                                                                                                                                                                                        | <ul style="list-style-type: none"> <li>Prior PCI or prior MI (+1p)</li> <li>Paclitaxel-eluting stent (+1p)</li> <li>Stent diameter <math>&lt; 3</math> mm (+1p)</li> <li>CHF or LVEF <math>&lt; 30\%</math> (+2p)</li> <li>Vein graft stent (+2p)</li> </ul>                                                                                                                                                                                                          | Score $\geq 2$ – Long DAT<br>Score $< 2$ – Standard DAT                                           |
| <b>ARC-HBR criteria</b>                                                                                                                                                                                                                                                                                                                                                                                                                                                                                                                                                                                                                                                                                                                                                                                                                                                                                                                                                                                                                                  |                                                                                                                                                                                                                                                                                                                                                                                                                                                                       |                                                                                                   |
| Major risk factors:                                                                                                                                                                                                                                                                                                                                                                                                                                                                                                                                                                                                                                                                                                                                                                                                                                                                                                                                                                                                                                      |                                                                                                                                                                                                                                                                                                                                                                                                                                                                       |                                                                                                   |
| <ul style="list-style-type: none"> <li>Anticipated use of long-term oral anticoagulation</li> <li>Severe or end-stage CKD (eGFR <math>&lt; 30</math> mL/min)</li> <li>Hemoglobin <math>&lt; 11</math> g/dL</li> <li>Spontaneous non-intracranial bleeding requiring hospitalization or transfusion in the past 6 months or at any time, if recurrent</li> <li>Moderate or severe baseline thrombocytopenia (<math>&lt; 100 \times 10^9/L</math>)</li> <li>Chronic bleeding diathesis</li> <li>Liver cirrhosis with portal hypertension</li> <li>Active malignancy (excluding non-melanoma skin cancer) within the past 12 months</li> <li>Previous spontaneous intracranial hemorrhage (at any time)</li> <li>Previous traumatic intracranial hemorrhage within the past 12 months</li> <li>Presence of brain arteriovenous malformation</li> <li>Moderate or severe ischemic stroke within 6 months</li> <li>Planned non-deferrable non-cardiac major surgery on DAT</li> <li>Recent major surgery or major trauma within 30 days before PCI</li> </ul> | Minor risk factors:                                                                                                                                                                                                                                                                                                                                                                                                                                                   |                                                                                                   |
|                                                                                                                                                                                                                                                                                                                                                                                                                                                                                                                                                                                                                                                                                                                                                                                                                                                                                                                                                                                                                                                          | <ul style="list-style-type: none"> <li>Age <math>\geq 75</math></li> <li>Moderate CKD (eGFR 30-59 mL/min)</li> <li>Hemoglobin 11-12.9 g/dL for men and 11-11.9 g/dL for women</li> <li>Spontaneous non-intracranial bleeding requiring hospitalization or transfusion within the past 12 months not meeting the major criterion</li> <li>Long-term use of oral NSAIDs or steroids</li> <li>Any ischemic stroke at any time not meeting the major criterion</li> </ul> | High bleeding risk = at least 1 major criterion or 2 minor criteria                               |
| <b>PARIS bleeding risk score</b>                                                                                                                                                                                                                                                                                                                                                                                                                                                                                                                                                                                                                                                                                                                                                                                                                                                                                                                                                                                                                         |                                                                                                                                                                                                                                                                                                                                                                                                                                                                       |                                                                                                   |
| <ul style="list-style-type: none"> <li>Age <math>&lt; 50</math> (0p)</li> <li>50-59 (+1p)</li> <li>60-69 (+2p)</li> <li>70-79 (+3p)</li> <li><math>\geq 80</math> (+4p)</li> <li>Current smoking (+2p)</li> </ul>                                                                                                                                                                                                                                                                                                                                                                                                                                                                                                                                                                                                                                                                                                                                                                                                                                        | <ul style="list-style-type: none"> <li>BMI, <math>kg/m^2 &lt; 25</math> (+2p)</li> <li>25-34.9 (0p)</li> <li><math>\geq 35</math> (+2p)</li> <li>Anemia (+3p)</li> <li>Creatinine clearance <math>&lt; 60</math> mL/min (+2p)</li> <li>Triple therapy on discharge (+2p)</li> </ul>                                                                                                                                                                                   | Low bleeding risk = 0 – 3p<br>Intermediate bleeding risk = 4 – 7p<br>High bleeding risk $\geq 8p$ |

**Table S2.** Comparative discrimination power of bleeding risk scores reported in clinical studies.

| Study                         | Risk scores evaluated                             | Results              |                          |
|-------------------------------|---------------------------------------------------|----------------------|--------------------------|
|                               |                                                   | c-statistic/AUROC    | Confidence interval (CI) |
| Costa et al, 2017             | PRECISE DAPT<br>(derivation cohort)               | 0.73                 | 95% CI (0.61 – 0.85)     |
|                               | PRECISE DAPT<br>(validation cohort – PLATO trial) | 0.70                 | 95% CI (0.65 – 0.74)     |
|                               | PRECISE DAPT<br>(validation cohort – BernPCI)     | 0.66                 | 95% CI (0.61 – 0.71)     |
| Choi et al, 2018              | PRECISE DAPT                                      | 0.81 (BARC)          | 95% CI (0.78 – 0.84)     |
|                               |                                                   | 0.75 (TIMI)          | 95% CI (0.72 – 0.78)     |
|                               |                                                   | 0.82 (GUSTO)         | 95% CI (0.80 – 0.85)     |
|                               | ACUITY                                            | 0.81 (BARC)          | 95% CI (0.78 – 0.83)     |
|                               |                                                   | 0.75 (TIMI)          | 95% CI (0.72 – 0.78)     |
|                               |                                                   | 0.79 (GUSTO)         | 95% CI (0.76 – 0.82)     |
|                               | CRUSADE                                           | 0.79 (BARC)          | 95% CI (0.76 – 0.81)     |
|                               |                                                   | 0.73 (TIMI)          | 95% CI (0.70 – 0.76)     |
|                               | 0.81 (GUSTO)                                      | 95% CI (0.78 – 0.83) |                          |
| Abu-Assi et al, 2018          | PRECISE DAPT                                      | 0.73                 | 95% CI (0.67 – 0.79)     |
|                               | PARIS                                             | 0.73                 | 95% CI (0.66 – 0.80)     |
| Ueki et al, 2020              | ARC-HBR                                           | 0.67                 | 95% CI (0.64 – 0.70)     |
|                               | PRECISE-DAPT                                      | 0.67                 | 95% CI (0.65 – 0.70)     |
|                               | PARIS                                             | 0.68                 | 95% CI (0.65 – 0.71)     |
| Yeh et al, 2016               | DAPT (derivation cohort)                          | 0.68                 | 95% CI (0.65 – 0.72)     |
|                               | DAPT<br>(validation cohort – PROTECT<br>trial)    | 0.64                 | 95% CI (0.55 – 0.73)     |
|                               |                                                   |                      |                          |
| Baber et al, 2016             | PARIS (derivation cohort)                         | 0.75                 | –                        |
|                               | PARIS (validation cohort –<br>ADAPT-DES)          | 0.64                 | –                        |
| Bianco et al, 2019            | PRECISE DAPT                                      | 0.653                | 95% CI (0.59 – 0.71)     |
|                               | PARIS                                             | 0.593                | 95% CI (0.52 – 0.65)     |
| Raposeiras-Roubin et al, 2018 | BleeMACS (derivation cohort)                      | 0.71                 | 95% CI (0.68 – 0.74)     |
|                               | BleeMACS (internal validation co-<br>hort)        | 0.72                 | 95% CI (0.67 – 0.76)     |
| Sharma et al, 2017            | Original                                          | 0.67                 | –                        |
| Flores-Rios et al, 2012       | CRUSADE                                           | 0.77                 | 95% CI (0.75 – 0.79)     |
|                               | ACUITY-HORIZONS                                   | 0.70                 | 95% CI (0.67 – 0.72)     |
|                               | ACTION                                            | 0.78                 | 95% CI (0.76 – 0.80)     |
| Ariza-Sole et al, 2013        | CRUSADE                                           | 0.80                 | 95% CI (0.73 – 0.87)     |
|                               | ACTION                                            | 0.75                 | 95% CI (0.69 – 0.80)     |
|                               | Mehran                                            | 0.76                 | 95% CI (0.71 – 0.82)     |
| Costa et al, 2015             | CRUSADE                                           | 0.71                 | 95% CI (0.64 – 0.77)     |
|                               | ACUITY                                            | 0.68                 | 95% CI (0.61 – 0.75)     |
|                               | HAS-BLED                                          | 0.63                 | 95% CI (0.56 – 0.70)     |
| Choi et al, 2020              | PRECISE-DAPT                                      | 0.754                | 95% CI (0.65 – 0.85)     |
| Kawashima et al, 2020         | PRECISE-DAPT                                      | 0.648                | 95% CI (0.61 – 0.67)     |
|                               | CRUSADE                                           | 0.641                | 95% CI (0.60 – 0.67)     |
|                               | ACUITY                                            | 0.633                | 95% CI (0.60 – 0.66)     |
| Cao et al, 2020               | ARC-HBR                                           | 0.68                 | 95% CI (0.65 – 0.71)     |
| Song et al, 2018              | DAPT                                              | 0.71                 | –                        |
|                               | PARIS                                             | 0.56                 | –                        |
| Ueda et al, 2018              | DAPT                                              | 0.49                 | 95% CI (0.45 – 0.53)     |

**Table S2.** Comparative discrimination power of bleeding risk scores reported in clinical studies – continued.

| Study                | Risk scores evaluated                           | Results           |                          |
|----------------------|-------------------------------------------------|-------------------|--------------------------|
|                      |                                                 | c-statistic/AUROC | Confidence interval (CI) |
| Gragnano et al, 2020 | PRECISE-DAPT (GLOBAL LEADERS) at 1 year         | 0.62              | 95% CI (0.58 – 0.67)     |
|                      | 4-item PRECISE-DAPT (GLOBAL LEADERS) at 1 year  | 0.60              | 95% CI (0.55 – 0.65)     |
|                      | PRECISE-DAPT (GLOBAL LEADERS) at 2 years        | 0.63              | 95% CI (0.59 – 0.67)     |
|                      | 4-item PRECISE-DAPT (GLOBAL LEADERS) at 2 years | 0.61              | 95% CI (0.57 – 0.65)     |
|                      | PRECISE-DAPT (GLASSY) at 1 year                 | 0.64              | 95% CI (0.58 – 0.71)     |
|                      | 4-item PRECISE-DAPT (GLASSY) at 1 year          | 0.63              | 95% CI (0.57 – 0.69)     |
|                      | PRECISE-DAPT (GLASSY) at 2 years                | 0.66              | 95% CI (0.61 – 0.72)     |
|                      | 4-item PRECISE-DAPT (GLASSY) at 2 years         | 0.65              | 95% CI (0.60 – 0.71)     |

**Table S3.** Risk of bias and applicability assessment based on PROBAST checklist.

| Study                                | ROB*  |        |         |          | Applicability (AP) |     |         | Overall |    |
|--------------------------------------|-------|--------|---------|----------|--------------------|-----|---------|---------|----|
|                                      | PRT** | PRD*** | Outcome | Analysis | PRT                | PRD | Outcome | ROB     | AP |
| Costa, 2017                          | +     | +      | +       | -        | +                  | +   | +       | -       | +  |
| Choi, 2018                           | +     | ?      | ?       | -        | +                  | +   | +       | -       | +  |
| Abu-Assi, 2018                       | +     | ?      | ?       | -        | +                  | +   | +       | -       | +  |
| Ueki, 2020                           | +     | ?      | ?       | -        | +                  | +   | +       | -       | +  |
| Yeh, 2016 (derivation)               | +     | ?      | ?       | ?        | +                  | +   | +       | ?       | +  |
| Baber, 2016 (derivation)             | +     | ?      | ?       | ?        | +                  | +   | +       | ?       | +  |
| Bianco, 2019                         | +     | ?      | ?       | -        | +                  | +   | +       | -       | +  |
| Raposeiras-Roubin, 2018 (derivation) | +     | ?      | ?       | -        | +                  | +   | +       | -       | +  |
| Sharma, 2017                         | +     | ?      | -       | ?        | +                  | +   | -       | -       | -  |
| Flores-Rios, 2012                    | +     | ?      | ?       | ?        | +                  | +   | +       | ?       | +  |
| Ariza-Sole, 2013                     | +     | +      | ?       | -        | +                  | +   | +       | -       | +  |
| Costa, 2015                          | +     | ?      | ?       | -        | +                  | +   | +       | -       | +  |
| Ueki, 2020                           | +     | ?      | ?       | -        | +                  | +   | +       | -       | +  |
| Choi, 2020                           | +     | +      | +       | -        | +                  | +   | +       | -       | +  |
| Kawashima, 2020                      | +     | +      | ?       | ?        | +                  | +   | +       | ?       | +  |
| Cao, 2020                            | +     | ?      | ?       | -        | +                  | +   | +       | -       | +  |
| Song, 2018                           | +     | ?      | ?       | -        | +                  | +   | +       | -       | +  |
| Ueda, 2018                           | +     | ?      | ?       | -        | +                  | +   | +       | -       | +  |
| Gragnano, 2020                       | +     | +      | +       | -        | +                  | +   | +       | -       | +  |

ROB\* = risk of bias; PRT\*\* = participants; PRD\*\*\* = predictors;

+ indicates low ROB/low concern regarding applicability; - indicates high ROB/concern regarding applicability; ? indicates unclear ROB/unclear concern regarding applicability
